# Supplementary material
Source: PubMed Central journal article supplement (PMC7936544)
Supplement: mmc1.pdf [file mmc1.pdf]

**Appendix**  
**Who Is (and Isn't) Receiving Telemedicine Care During the COVID-19 Pandemic**  
**Cantor et al.**

**Appendix Table 1.** List of Procedure Codes Used to Categorize an Office Visit

| <b>Procedure code</b> | <b>High level care category</b> | <b>Care category</b> |
|-----------------------|---------------------------------|----------------------|
| 0188T                 | Office visits and consults      | Facility visits      |
| 0189T                 | Office visits and consults      | Facility visits      |
| 99053                 | Office visits and consults      | Facility visits      |
| 99217                 | Office visits and consults      | Facility visits      |
| 99218                 | Office visits and consults      | Facility visits      |
| 99219                 | Office visits and consults      | Facility visits      |
| 99220                 | Office visits and consults      | Facility visits      |
| 99221                 | Office visits and consults      | Facility visits      |
| 99222                 | Office visits and consults      | Facility visits      |
| 99223                 | Office visits and consults      | Facility visits      |
| 99224                 | Office visits and consults      | Facility visits      |
| 99225                 | Office visits and consults      | Facility visits      |
| 99226                 | Office visits and consults      | Facility visits      |
| 99231                 | Office visits and consults      | Facility visits      |
| 99232                 | Office visits and consults      | Facility visits      |
| 99233                 | Office visits and consults      | Facility visits      |
| 99234                 | Office visits and consults      | Facility visits      |
| 99235                 | Office visits and consults      | Facility visits      |
| 99236                 | Office visits and consults      | Facility visits      |
| 99238                 | Office visits and consults      | Facility visits      |
| 99239                 | Office visits and consults      | Facility visits      |
| 99291                 | Office visits and consults      | Facility visits      |
| 99292                 | Office visits and consults      | Facility visits      |
| 99293                 | Office visits and consults      | Facility visits      |
| 99294                 | Office visits and consults      | Facility visits      |
| 99295                 | Office visits and consults      | Facility visits      |
| 99296                 | Office visits and consults      | Facility visits      |
| 99297                 | Office visits and consults      | Facility visits      |
| 99298                 | Office visits and consults      | Facility visits      |
| 99299                 | Office visits and consults      | Facility visits      |
| 99300                 | Office visits and consults      | Facility visits      |
| 99301                 | Office visits and consults      | Facility visits      |
| 99302                 | Office visits and consults      | Facility visits      |
| 99303                 | Office visits and consults      | Facility visits      |
| 99304                 | Office visits and consults      | Facility visits      |
| 99305                 | Office visits and consults      | Facility visits      |
| 99306                 | Office visits and consults      | Facility visits      |
| 99307                 | Office visits and consults      | Facility visits      |
| 99308                 | Office visits and consults      | Facility visits      |
| 99309                 | Office visits and consults      | Facility visits      |
| 99310                 | Office visits and consults      | Facility visits      |
| 99311                 | Office visits and consults      | Facility visits      |
| 99312                 | Office visits and consults      | Facility visits      |
| 99313                 | Office visits and consults      | Facility visits      |

**Appendix**  
**Who Is (and Isn't) Receiving Telemedicine Care During the COVID-19 Pandemic**  
**Cantor et al.**

|       |                            |                 |
|-------|----------------------------|-----------------|
| 99315 | Office visits and consults | Facility visits |
| 99316 | Office visits and consults | Facility visits |
| 99318 | Office visits and consults | Facility visits |
| 99321 | Office visits and consults | Facility visits |
| 99322 | Office visits and consults | Facility visits |
| 99323 | Office visits and consults | Facility visits |
| 99324 | Office visits and consults | Facility visits |
| 99325 | Office visits and consults | Facility visits |
| 99326 | Office visits and consults | Facility visits |
| 99327 | Office visits and consults | Facility visits |
| 99328 | Office visits and consults | Facility visits |
| 99331 | Office visits and consults | Facility visits |
| 99332 | Office visits and consults | Facility visits |
| 99333 | Office visits and consults | Facility visits |
| 99334 | Office visits and consults | Facility visits |
| 99335 | Office visits and consults | Facility visits |
| 99336 | Office visits and consults | Facility visits |
| 99337 | Office visits and consults | Facility visits |
| 99339 | Office visits and consults | Facility visits |
| 99340 | Office visits and consults | Facility visits |
| 99356 | Office visits and consults | Facility visits |
| 99357 | Office visits and consults | Facility visits |
| 99360 | Office visits and consults | Facility visits |
| 99431 | Office visits and consults | Facility visits |
| 99433 | Office visits and consults | Facility visits |
| 99435 | Office visits and consults | Facility visits |
| 99436 | Office visits and consults | Facility visits |
| 99440 | Office visits and consults | Facility visits |
| 99460 | Office visits and consults | Facility visits |
| 99462 | Office visits and consults | Facility visits |
| 99463 | Office visits and consults | Facility visits |
| 99464 | Office visits and consults | Facility visits |
| 99465 | Office visits and consults | Facility visits |
| 99468 | Office visits and consults | Facility visits |
| 99469 | Office visits and consults | Facility visits |
| 99471 | Office visits and consults | Facility visits |
| 99472 | Office visits and consults | Facility visits |
| 99475 | Office visits and consults | Facility visits |
| 99476 | Office visits and consults | Facility visits |
| 99477 | Office visits and consults | Facility visits |
| 99478 | Office visits and consults | Facility visits |
| 99479 | Office visits and consults | Facility visits |
| 99480 | Office visits and consults | Facility visits |
| 99481 | Office visits and consults | Facility visits |
| 99482 | Office visits and consults | Facility visits |
| G0378 | Office visits and consults | Facility visits |

**Appendix**  
**Who Is (and Isn't) Receiving Telemedicine Care During the COVID-19 Pandemic**  
**Cantor et al.**

|       |                            |                    |
|-------|----------------------------|--------------------|
| G0379 | Office visits and consults | Facility visits    |
| G9679 | Office visits and consults | Facility visits    |
| G9680 | Office visits and consults | Facility visits    |
| G9681 | Office visits and consults | Facility visits    |
| G9682 | Office visits and consults | Facility visits    |
| G9683 | Office visits and consults | Facility visits    |
| G9684 | Office visits and consults | Facility visits    |
| G9685 | Office visits and consults | Facility visits    |
| G9686 | Office visits and consults | Facility visits    |
| S0310 | Office visits and consults | Facility visits    |
| 99251 | Office visits and consults | Inpatient consults |
| 99252 | Office visits and consults | Inpatient consults |
| 99253 | Office visits and consults | Inpatient consults |
| 99254 | Office visits and consults | Inpatient consults |
| 99255 | Office visits and consults | Inpatient consults |
| 99261 | Office visits and consults | Inpatient consults |
| 99262 | Office visits and consults | Inpatient consults |
| 99263 | Office visits and consults | Inpatient consults |
| G0406 | Office visits and consults | Inpatient consults |
| G0407 | Office visits and consults | Inpatient consults |
| G0408 | Office visits and consults | Inpatient consults |
| G0459 | Office visits and consults | Inpatient consults |
| 99024 | Office visits and consults | Office visit       |
| 99025 | Office visits and consults | Office visit       |
| 99050 | Office visits and consults | Office visit       |
| 99051 | Office visits and consults | Office visit       |
| 99201 | Office visits and consults | Office visit       |
| 99202 | Office visits and consults | Office visit       |
| 99203 | Office visits and consults | Office visit       |
| 99204 | Office visits and consults | Office visit       |
| 99205 | Office visits and consults | Office visit       |
| 99211 | Office visits and consults | Office visit       |
| 99212 | Office visits and consults | Office visit       |
| 99213 | Office visits and consults | Office visit       |
| 99214 | Office visits and consults | Office visit       |
| 99215 | Office visits and consults | Office visit       |
| 99354 | Office visits and consults | Office visit       |
| 99355 | Office visits and consults | Office visit       |
| 99401 | Office visits and consults | Office visit       |
| 99402 | Office visits and consults | Office visit       |
| 99403 | Office visits and consults | Office visit       |
| 99404 | Office visits and consults | Office visit       |
| 99415 | Office visits and consults | Office visit       |
| 99416 | Office visits and consults | Office visit       |
| 99450 | Office visits and consults | Office visit       |
| 99455 | Office visits and consults | Office visit       |

**Appendix**  
**Who Is (and Isn't) Receiving Telemedicine Care During the COVID-19 Pandemic**  
**Cantor et al.**

|       |                            |                                      |
|-------|----------------------------|--------------------------------------|
| 99456 | Office visits and consults | Office visit                         |
| G0245 | Office visits and consults | Office visit                         |
| G0246 | Office visits and consults | Office visit                         |
| G0247 | Office visits and consults | Office visit                         |
| G0463 | Office visits and consults | Office visit                         |
| G0466 | Office visits and consults | Office visit                         |
| G0467 | Office visits and consults | Office visit                         |
| G0468 | Office visits and consults | Office visit                         |
| G0469 | Office visits and consults | Office visit                         |
| G0470 | Office visits and consults | Office visit                         |
| G0511 | Office visits and consults | Office visit                         |
| G0512 | Office visits and consults | Office visit                         |
| G2063 | Office visits and consults | Office visit                         |
| S0206 | Office visits and consults | Office visit                         |
| S0260 | Office visits and consults | Office visit                         |
| S0302 | Office visits and consults | Office visit                         |
| S0390 | Office visits and consults | Office visit                         |
| S0622 | Office visits and consults | Office visit                         |
| T1015 | Office visits and consults | Office visit                         |
| T1025 | Office visits and consults | Office visit                         |
| T1026 | Office visits and consults | Office visit                         |
| T1040 | Office visits and consults | Office visit                         |
| T1041 | Office visits and consults | Office visit                         |
| 99271 | Office visits and consults | Other consults, location unspecified |
| 99272 | Office visits and consults | Other consults, location unspecified |
| 99273 | Office visits and consults | Other consults, location unspecified |
| 99274 | Office visits and consults | Other consults, location unspecified |
| 99275 | Office visits and consults | Other consults, location unspecified |
| G0425 | Office visits and consults | Other consults, location unspecified |
| G0426 | Office visits and consults | Other consults, location unspecified |
| G0427 | Office visits and consults | Other consults, location unspecified |
| G0508 | Office visits and consults | Other consults, location unspecified |
| G0509 | Office visits and consults | Other consults, location unspecified |
| S0265 | Office visits and consults | Other consults, location unspecified |
| 99406 | Office visits and consults | Other preventive medical services    |
| 99407 | Office visits and consults | Other preventive medical services    |
| 99408 | Office visits and consults | Other preventive medical services    |
| 99409 | Office visits and consults | Other preventive medical services    |
| 99411 | Office visits and consults | Other preventive medical services    |
| 99412 | Office visits and consults | Other preventive medical services    |
| 99420 | Office visits and consults | Other preventive medical services    |
| 99429 | Office visits and consults | Other preventive medical services    |
| C9801 | Office visits and consults | Other preventive medical services    |
| C9802 | Office visits and consults | Other preventive medical services    |
| G0375 | Office visits and consults | Other preventive medical services    |
| G0376 | Office visits and consults | Other preventive medical services    |

**Appendix**  
**Who Is (and Isn't) Receiving Telemedicine Care During the COVID-19 Pandemic**  
**Cantor et al.**

|       |                            |                                   |
|-------|----------------------------|-----------------------------------|
| G0396 | Office visits and consults | Other preventive medical services |
| G0397 | Office visits and consults | Other preventive medical services |
| G0436 | Office visits and consults | Other preventive medical services |
| G0437 | Office visits and consults | Other preventive medical services |
| G0442 | Office visits and consults | Other preventive medical services |
| G0443 | Office visits and consults | Other preventive medical services |
| G0444 | Office visits and consults | Other preventive medical services |
| G0445 | Office visits and consults | Other preventive medical services |
| G0446 | Office visits and consults | Other preventive medical services |
| G0447 | Office visits and consults | Other preventive medical services |
| G0450 | Office visits and consults | Other preventive medical services |
| G0473 | Office visits and consults | Other preventive medical services |
| G2011 | Office visits and consults | Other preventive medical services |
| G9873 | Office visits and consults | Other preventive medical services |
| G9874 | Office visits and consults | Other preventive medical services |
| G9875 | Office visits and consults | Other preventive medical services |
| G9876 | Office visits and consults | Other preventive medical services |
| G9877 | Office visits and consults | Other preventive medical services |
| G9878 | Office visits and consults | Other preventive medical services |
| G9879 | Office visits and consults | Other preventive medical services |
| G9880 | Office visits and consults | Other preventive medical services |
| G9881 | Office visits and consults | Other preventive medical services |
| G9882 | Office visits and consults | Other preventive medical services |
| G9883 | Office visits and consults | Other preventive medical services |
| G9884 | Office visits and consults | Other preventive medical services |
| G9885 | Office visits and consults | Other preventive medical services |
| G9890 | Office visits and consults | Other preventive medical services |
| G9891 | Office visits and consults | Other preventive medical services |
| H0021 | Office visits and consults | Other preventive medical services |
| H0022 | Office visits and consults | Other preventive medical services |
| H0023 | Office visits and consults | Other preventive medical services |
| H0024 | Office visits and consults | Other preventive medical services |
| H0025 | Office visits and consults | Other preventive medical services |
| H0026 | Office visits and consults | Other preventive medical services |
| H0027 | Office visits and consults | Other preventive medical services |
| H0028 | Office visits and consults | Other preventive medical services |
| H0029 | Office visits and consults | Other preventive medical services |
| H0030 | Office visits and consults | Other preventive medical services |
| S5190 | Office visits and consults | Other preventive medical services |
| 99241 | Office visits and consults | Outpatient consults               |
| 99242 | Office visits and consults | Outpatient consults               |
| 99243 | Office visits and consults | Outpatient consults               |
| 99244 | Office visits and consults | Outpatient consults               |
| 99245 | Office visits and consults | Outpatient consults               |
| S0250 | Office visits and consults | Outpatient consults               |
| S0285 | Office visits and consults | Outpatient consults               |

**Appendix**  
**Who Is (and Isn't) Receiving Telemedicine Care During the COVID-19 Pandemic**  
**Cantor et al.**

|       |                            |                        |
|-------|----------------------------|------------------------|
| 99381 | Office visits and consults | Preventive care visits |
| 99382 | Office visits and consults | Preventive care visits |
| 99383 | Office visits and consults | Preventive care visits |
| 99384 | Office visits and consults | Preventive care visits |
| 99385 | Office visits and consults | Preventive care visits |
| 99386 | Office visits and consults | Preventive care visits |
| 99387 | Office visits and consults | Preventive care visits |
| 99391 | Office visits and consults | Preventive care visits |
| 99392 | Office visits and consults | Preventive care visits |
| 99393 | Office visits and consults | Preventive care visits |
| 99394 | Office visits and consults | Preventive care visits |
| 99395 | Office visits and consults | Preventive care visits |
| 99396 | Office visits and consults | Preventive care visits |
| 99397 | Office visits and consults | Preventive care visits |
| G0344 | Office visits and consults | Preventive care visits |
| G0402 | Office visits and consults | Preventive care visits |
| G0438 | Office visits and consults | Preventive care visits |
| G0439 | Office visits and consults | Preventive care visits |
| G0513 | Office visits and consults | Preventive care visits |
| G0514 | Office visits and consults | Preventive care visits |
| S0610 | Office visits and consults | Preventive care visits |
| S0612 | Office visits and consults | Preventive care visits |
| S0613 | Office visits and consults | Preventive care visits |

**Appendix**  
**Who Is (and Isn't) Receiving Telemedicine Care During the COVID-19 Pandemic**  
**Cantor et al.**

**Appendix Table 2.** Rates of Telemedicine and Office-based Healthcare Utilization

| Demographic characteristic              | Total visits       |                    |                | Telemedicine                |                              |                | In-person care              |                              |                |
|-----------------------------------------|--------------------|--------------------|----------------|-----------------------------|------------------------------|----------------|-----------------------------|------------------------------|----------------|
|                                         | Rate pre-COVID     | Rate post-COVID    | Change in rate | Rate <sup>a</sup> pre-COVID | Rate <sup>b</sup> post-COVID | Change in rate | Rate <sup>c</sup> pre-COVID | Rate <sup>d</sup> post-COVID | Change in rate |
| <b>Sex</b>                              |                    |                    |                |                             |                              |                |                             |                              |                |
| Female                                  | 711.3<br>(1,156.6) | 573.0<br>(997.9)   | -138.3         | 4.1<br>(81.8)               | 118.2<br>(400.4)             | 114.1          | 707.2<br>(1,153.3)          | 454.8<br>(909.2)             | -252.4         |
| Male                                    | 568.7<br>(1,064.4) | 436.0<br>(885.7)   | -132.7         | 2.5<br>(66.3)               | 76.9<br>(316.4)              | 74.4           | 566.2<br>(1,061.8)          | 359.1<br>(823.4)             | -207.114       |
| <b>Age group</b>                        |                    |                    |                |                             |                              |                |                             |                              |                |
| Young children (0–12 years)             | 754.3<br>(1,409.1) | 490.1<br>(1,126.2) | -264.2         | 2.7<br>(80.6)               | 63.2<br>(338.6)              | 60.6           | 751.7<br>(1,406.4)          | 426.9<br>(1,070.5)           | -324.8         |
| Teenagers (13–18 years)                 | 489.2<br>(964.0)   | 377.7<br>(826.3)   | -111.5         | 3.0<br>(71.5)               | 103.2<br>(415.9)             | 100.2          | 486.1<br>(960.7)            | 274.5<br>(709.0)             | -211.7         |
| Younger adults (19–45 years)            | 456.2<br>(964.0)   | 421.6<br>(742.1)   | -34.5          | 4.4<br>(78.9)               | 101.1<br>(334.2)             | 96.6           | 451.7<br>(812.6)            | 320.5<br>(653.2)             | -131.1         |
| Older adults (≥46 years)                | 796.1<br>(1,111.2) | 659.8<br>(985.6)   | -136.3         | 2.8<br>(64.9)               | 121.4<br>(376.7)             | 118.6          | 793.3<br>(1,108.7)          | 538.4<br>(907.5)             | -254.9         |
| <b>% Below poverty line<sup>e</sup></b> |                    |                    |                |                             |                              |                |                             |                              |                |
| 1st Quartile (lowest)                   | 620.8<br>(1,067.1) | 489.6<br>(934.4)   | -131.2         | 3.6<br>(71.2)               | 116.1<br>(380.9)             | 112.5          | 617.2<br>(1,063.8)          | 373.6<br>(848.2)             | -243.6         |
| 2nd Quartile                            | 622.0<br>(1,088.2) | 489.4<br>(918.3)   | -132.6         | 3.4<br>(71.1)               | 99.6<br>(362.0)              | 96.1           | 618.6<br>(1,085.6)          | 389.8<br>(837.0)             | -228.7         |
| 3rd Quartile                            | 646.5<br>(1,077.5) | 511.5<br>(904.5)   | -135.0         | 3.4<br>(78.4)               | 90.9<br>(330.6)              | 87.5           | 643.1<br>(1,074.3)          | 420.5<br>(839.8)             | -222.6         |
| 4th Quartile (highest)                  | 671.9<br>(1,223.7) | 527.8<br>(1,029.0) | -144.2         | 2.7<br>(76.6)               | 83.5<br>(372.5)              | 80.7           | 669.2<br>(1,220.8)          | 444.3<br>(949.7)             | -224.9         |
| <b>Rurality<sup>f</sup></b>             |                    |                    |                |                             |                              |                |                             |                              |                |
| Metropolitan                            | 661.2<br>(574.3)   | 522.8<br>(462.1)   | -138.4         | 3.4<br>(28.9)               | 125.9<br>(182.7)             | 122.5          | 657.8<br>(573.4)            | 396.9<br>(431.9)             | -260.9         |
| Not metropolitan                        | 630.1<br>(1,284.8) | 496.1<br>(1,092.6) | -134.0         | 3.2<br>(87.6)               | 85.0<br>(415.7)              | 81.7           | 626.9<br>(1,281.2)          | 411.2<br>(1,002.0)           | -215.7         |
| <b>% White</b>                          |                    |                    |                |                             |                              |                |                             |                              |                |
| 1st Quartile (lowest)                   | 653.1<br>(1,077.7) | 519.2<br>(940.9)   | -133.9         | 3.2<br>(64.0)               | 101.4<br>(354.9)             | 98.2           | 650.0<br>(1,075.1)          | 417.8<br>(862.5)             | -232.1         |
| 2nd Quartile                            | 657.3<br>(993.7)   | 520.8<br>(843.2)   | -136.5         | 3.5<br>(80.7)               | 104.1<br>(324.5)             | 100.6          | 653.8<br>(990.3)            | 416.7<br>(775.5)             | -237.1         |
| 3rd Quartile                            | 620.7<br>(1,110.5) | 488.2<br>(939.5)   | -132.5         | 3.5<br>(76.3)               | 97.9<br>(371.3)              | 94.3           | 617.1<br>(1,097.3)          | 390.3<br>(857.7)             | -226.9         |

**Appendix**  
**Who Is (and Isn't) Receiving Telemedicine Care During the COVID-19 Pandemic**  
**Cantor et al.**

|                                           |                    |                    |        |                |                  |       |                    |                    |        |
|-------------------------------------------|--------------------|--------------------|--------|----------------|------------------|-------|--------------------|--------------------|--------|
| 4th Quartile (highest)                    | 627.6<br>(1,282.2) | 488.5<br>(1,060.8) | -139.1 | 2.9<br>(74.5)  | 85.6<br>(394.4)  | 82.7  | 624.7<br>(1,279.5) | 402.9<br>(979.5)   | -221.8 |
| <b>% Black</b>                            |                    |                    |        |                |                  |       |                    |                    |        |
| 1st Quartile (lowest)                     | 580.1<br>(1,394.2) | 460.3<br>(1,211.2) | -119.8 | 3.4<br>(100.4) | 83.7<br>(479.9)  | 80.2  | 576.7<br>(1,389.7) | 376.7<br>(1,102.2) | -200.0 |
| 2nd Quartile                              | 613.7<br>(1,136.7) | 478.3<br>(939.0)   | -135.4 | 3.3<br>(68.2)  | 94.6<br>(354.1)  | 91.3  | 610.4<br>(1,134.1) | 383.7<br>(863.1)   | -226.7 |
| 3rd Quartile                              | 655.3<br>(1,002.5) | 514.8<br>(838.8)   | -140.5 | 3.5<br>(74.6)  | 106.3<br>(313.8) | 102.7 | 651.8<br>(999.7)   | 408.5<br>(776.4)   | -243.3 |
| 4th Quartile (highest)                    | 688.9<br>(955.2)   | 547.9<br>(814.5)   | -141.0 | 3.0<br>(54.8)  | 101.6<br>(303.2) | 98.6  | 685.9<br>(953.1)   | 446.3<br>(752.5)   | -239.6 |
| <b>% Hispanic</b>                         |                    |                    |        |                |                  |       |                    |                    |        |
| 1st Quartile (lowest)                     | 654.4<br>(1,263.9) | 509.4<br>(1,038.4) | -144.9 | 2.9<br>(79.7)  | 87.7<br>(383.3)  | 84.8  | 651.5<br>(1,260.8) | 421.7<br>(961.2)   | -229.8 |
| 2nd Quartile                              | 640.2<br>(1,127.7) | 505.4<br>(957.5)   | -134.8 | 3.0<br>(70.3)  | 92.5<br>(363.4)  | 89.5  | 637.2<br>(1,124.9) | 412.9<br>(880.2)   | -224.4 |
| 3rd Quartile                              | 636.2<br>(982.2)   | 497.2<br>(836.3)   | -139.0 | 3.4<br>(66.8)  | 101.5<br>(321.6) | 98.1  | 632.7<br>(979.9)   | 395.6<br>(766.5)   | -237.1 |
| 4th Quartile (highest)                    | 627.9<br>(1,067.1) | 505.6<br>(945.5)   | -122.2 | 4.0<br>(81.3)  | 109.1<br>(376.8) | 105.1 | 623.9<br>(1,063.8) | 396.5<br>(859.3)   | -227.4 |
| <b>COVID-19 prevalence<sup>g</sup></b>    |                    |                    |        |                |                  |       |                    |                    |        |
| 1st Quartile (lowest)                     | 590.1<br>(1,317.9) | 466.8<br>(1,132.6) | -123.3 | 3.5<br>(96.8)  | 91.7<br>(453.6)  | 88.2  | 586.5<br>(1,314.2) | 375.1<br>(1,031.9) | -211.5 |
| 2nd Quartile                              | 620.5<br>(1,143.0) | 490.0<br>(952.6)   | -130.5 | 3.7<br>(87.5)  | 98.5<br>(377.6)  | 94.8  | 616.8<br>(1,138.5) | 391.5<br>(868.8)   | -225.3 |
| 3rd Quartile                              | 657.5<br>(996.3)   | 515.9<br>(839.0)   | -141.6 | 3.2<br>(55.0)  | 100.4<br>(298.5) | 97.1  | 654.2<br>(994.6)   | 415.5<br>(779.7)   | -238.7 |
| 4th Quartile (highest)                    | 678.4<br>(1,017.7) | 535.6<br>(873.1)   | -142.8 | 2.8<br>(55.8)  | 98.2<br>(317.7)  | 95.4  | 675.6<br>(1,015.7) | 437.4<br>(807.3)   | -238.2 |
| <b>Unemployment rate<sup>h</sup></b>      |                    |                    |        |                |                  |       |                    |                    |        |
| 1st Quartile (lowest)                     | 608.0<br>(1,357.4) | 483.0<br>(1,173.4) | -125.0 | 3.6<br>(100.1) | 78.5<br>(415.1)  | 75.0  | 604.4<br>(1,352.9) | 404.5<br>(1,086.6) | -199.9 |
| 2nd Quartile                              | 635.2<br>(1,074.5) | 506.4<br>(914.3)   | -128.9 | 3.3<br>(73.7)  | 91.6<br>(344.8)  | 88.3  | 631.9<br>(1,071.2) | 414.7<br>(842.4)   | -217.2 |
| 3rd Quartile                              | 664.2<br>(1,046.5) | 519.9<br>(871.1)   | -144.3 | 3.4<br>(65.5)  | 101.4<br>(347.0) | 98.0  | 660.8<br>(1,044.3) | 418.5<br>(797.4)   | -242.2 |
| 4th Quartile (highest)                    | 644.6<br>(994.1)   | 503.3<br>(836.9)   | -141.3 | 3.0<br>(57.8)  | 114.7<br>(343.7) | 111.7 | 641.6<br>(992.3)   | 388.6<br>(757.7)   | -253.0 |
| <b>Without broadband rate<sup>i</sup></b> |                    |                    |        |                |                  |       |                    |                    |        |
| 1st Quartile (lowest)                     | 655.6              | 517.1              | -138.5 | 3.6            | 125.5            | 121.8 | 652.0              | 391.6              | -260.3 |



**Appendix**  
**Who Is (and Isn't) Receiving Telemedicine Care During the COVID-19 Pandemic**  
**Cantor et al.**

|                                              |           |           |        |         |         |       |           |           |        |
|----------------------------------------------|-----------|-----------|--------|---------|---------|-------|-----------|-----------|--------|
|                                              | (766.3)   | (648.6)   |        | (50.1)  | (249.3) |       | (764.2)   | (600.0)   |        |
| 2nd Quartile                                 | 646.9     | 512.1     | -134.8 | 3.4     | 96.9    | 93.4  | 643.4     | 415.2     | -228.2 |
|                                              | (1,015.9) | (861.3)   |        | (67.6)  | (336.2) |       | (1,012.9) | (786.6)   |        |
| 3rd Quartile                                 | 633.5     | 498.0     | -135.5 | 2.9     | 83.1    | 80.2  | 630.6     | 414.9     | -215.8 |
|                                              | (1,210.5) | (1,022.9) |        | (76.5)  | (371.7) |       | (1,208.1) | (945.6)   |        |
| 4th Quartile (highest)                       | 617.3     | 485.4     | -131.9 | 3.2     | 79.8    | 76.6  | 614.1     | 405.7     | -208.5 |
|                                              | (1,448.0) | (1,229.6) |        | (102.0) | (479.3) |       | (1,443.6) | (1,123.9) |        |
| <b>% No English in household<sup>j</sup></b> |           |           |        |         |         |       |           |           |        |
| 1st Quartile (lowest)                        | 658.8     | 514.4     | -144.5 | 2.5     | 80.6    | 78.1  | 656.3     | 433.8     | -222.5 |
|                                              | (1,276.8) | (1,054.0) |        | (73.7)  | (370.2) |       | (1,274.1) | (981.0)   |        |
| 2nd Quartile                                 | 627.1     | 491.9     | -135.2 | 3.1     | 92.4    | 89.3  | 624.0     | 400.0     | -224.4 |
|                                              | (1,141.5) | (971.5)   |        | (79.2)  | (377.2) |       | (1,138.2) | (889.9)   |        |
| 3rd Quartile                                 | 639.2     | 506.4     | -132.9 | 3.6     | 102.3   | 98.7  | 635.6     | 404.1     | -231.5 |
|                                              | (984.6)   | (839.4)   |        | (67.4)  | (340.1) |       | (981.6)   | (762.0)   |        |
| 4th Quartile (highest)                       | 632.8     | 504.0     | -128.9 | 4.0     | 117.0   | 113.0 | 628.8     | 387.0     | -241.8 |
|                                              | (1,022.8) | (902.6)   |        | (77.7)  | (356.1) |       | (1,019.7) | (822.7)   |        |

<sup>a</sup>Number of persons receiving telemedicine care per 10,000 eligible beneficiaries on a weekly basis for all of 2019 and weeks 1 through 10 in 2020.

<sup>b</sup>Number of persons receiving telemedicine care per 10,000 eligible beneficiaries on a weekly basis from weeks 11 through 31.

<sup>c</sup>Number of persons receiving office-based care per 10,000 eligible beneficiaries on a weekly basis for all of 2019 and weeks 1 through 10 in 2020.

<sup>d</sup>Number of persons receiving office-based care per 10,000 eligible beneficiaries on a weekly basis from weeks 11 through 31.

<sup>e</sup>Share of U.S. county (percent) living below the federal poverty line in the county where the patient resides

(<https://www.census.gov/topics/income-poverty/poverty/data/tables/acs.html>).

<sup>f</sup>U.S. county metropolitan classification according to the county where the patient resides

([https://www.cdc.gov/nchs/data\\_access/urban\\_rural.htm](https://www.cdc.gov/nchs/data_access/urban_rural.htm)).

<sup>g</sup>Is the number of COVID-19 cases per 10,000 population in the county as of July 31, 2020 from USAFacts.

<sup>h</sup>Is the county-level unemployment rate as reported by the Bureau of Labor Statistics for July.

<sup>i</sup>Is the share of a county that does not have broadband internet as reported by the Federal Communications Commission using the Mapping Broadband Health in America.

<sup>j</sup>Is the share of a county that does not only speak English only in their household as reported in the 5-year American Community Survey.

**Appendix**  
**Who Is (and Isn't) Receiving Telemedicine Care During the COVID-19 Pandemic**  
**Cantor et al.**

**Appendix Table 3.** Full Regression Results of Telemedicine Utilization Before Versus After Start of COVID-19 Pandemic With Interactions by Patient Age, County Urbanicity and Percent of Population in Poverty Within the County

| Variable                                                       | (1)<br>Model interaction age<br>and post dummy | (2)<br>Model interaction<br>urbanicity and post<br>dummy | (3)<br>Model interaction<br>poverty and post<br>dummy |
|----------------------------------------------------------------|------------------------------------------------|----------------------------------------------------------|-------------------------------------------------------|
| Pre-post dummy variable (baseline is pre period <sup>a</sup> ) | 119.5***<br>(107.4, 131.5)                     | 123.3***<br>(111.4, 135.2)                               | 113.3***<br>(97.18, 129.4)                            |
| Age category (Older adults ≥46 years is baseline)              |                                                |                                                          |                                                       |
| Young children (0-12 years)                                    | -0.884***<br>(-1.517, -0.251)                  | -15.93***<br>(-17.95, -13.91)                            | -15.96***<br>(-17.97, -13.95)                         |
| Teenagers (13-18 years)                                        | -0.0940<br>(-0.798, 0.610)                     | -4.820**<br>(-8.506, -1.134)                             | -4.826**<br>(-8.512, -1.139)                          |
| Younger adults (19-45 years)                                   | 1.703***<br>(1.218, 2.188)                     | -4.000***<br>(-6.080, -1.920)                            | -3.982***<br>(-6.067, -1.898)                         |
| Female dummy                                                   | 11.92***<br>(10.57, 13.27)                     | 11.92***<br>(10.57, 13.28)                               | 11.93***<br>(10.58, 13.28)                            |
| Rural dummy <sup>b</sup>                                       | -3.474***<br>(-5.066, -1.882)                  | 6.933***<br>(4.132, 9.735)                               | -3.519***<br>(-5.114, -1.924)                         |
| Percent White (baseline is 1st Quartile [lowest])              |                                                |                                                          |                                                       |
| 2nd Quartile                                                   | 1.726<br>(-0.620, 4.073)                       | 1.715<br>(-0.638, 4.068)                                 | 1.740<br>(-0.625, 4.106)                              |
| 3rd Quartile                                                   | 3.332*<br>(-0.338, 7.001)                      | 3.289*<br>(-0.388, 6.966)                                | 3.310*<br>(-0.362, 6.982)                             |
| 4th Quartile (highest)                                         | 1.399<br>(-3.486, 6.285)                       | 1.336<br>(-3.567, 6.239)                                 | 1.334<br>(-3.582, 6.250)                              |
| Percent Black (baseline is 1st Quartile [lowest])              |                                                |                                                          |                                                       |
| 2nd Quartile                                                   | -1.448<br>(-3.733, 0.838)                      | -1.455<br>(-3.728, 0.818)                                | -1.459<br>(-3.729, 0.812)                             |
| 3rd Quartile                                                   | -0.374<br>(-3.070, 2.323)                      | -0.361<br>(-3.056, 2.333)                                | -0.356<br>(-3.048, 2.335)                             |
| 4th Quartile (highest)                                         | 1.468<br>(-2.080, 5.015)                       | 1.434<br>(-2.110, 4.978)                                 | 1.418<br>(-2.145, 4.982)                              |
| Percent Hispanic (baseline is 1st Quartile [lowest])           |                                                |                                                          |                                                       |
| 2nd Quartile                                                   | 0.715<br>(-1.595, 3.025)                       | 0.650<br>(-1.656, 2.957)                                 | 0.666<br>(-1.646, 2.977)                              |
| 3rd Quartile                                                   | 0.236<br>(-2.271, 2.744)                       | 0.204<br>(-2.307, 2.715)                                 | 0.240<br>(-2.276, 2.757)                              |
| 4th Quartile (highest)                                         | 2.210<br>(-1.542, 5.961)                       | 2.215<br>(-1.537, 5.967)                                 | 2.212<br>(-1.540, 5.963)                              |

**Appendix**  
**Who Is (and Isn't) Receiving Telemedicine Care During the COVID-19 Pandemic**  
**Cantor et al.**

|                                                                                        |                               |                               |                               |
|----------------------------------------------------------------------------------------|-------------------------------|-------------------------------|-------------------------------|
| Percent below poverty line (baseline is 1st Quartile [lowest]) <sup>c</sup>            |                               |                               |                               |
| 2nd Quartile                                                                           | -2.868**<br>(-5.137, -0.598)  | -2.859**<br>(-5.121, -0.598)  | 1.319<br>(-1.408, 4.046)      |
| 3rd Quartile                                                                           | -4.757***<br>(-7.542, -1.972) | -4.746***<br>(-7.524, -1.968) | 1.678<br>(-1.930, 5.285)      |
| 4th Quartile (highest)                                                                 | -5.915***<br>(-9.298, -2.531) | -5.887***<br>(-9.272, -2.501) | 2.323<br>(-1.965, 6.610)      |
| COVID-19 prevalence (baseline is 1st Quartile [lowest]) <sup>d</sup>                   |                               |                               |                               |
| 2nd Quartile                                                                           | 2.892***<br>(0.921, 4.863)    | 2.889***<br>(0.923, 4.854)    | 2.912***<br>(0.949, 4.875)    |
| 3rd Quartile                                                                           | 1.114<br>(-1.013, 3.241)      | 1.119<br>(-1.003, 3.241)      | 1.161<br>(-0.970, 3.292)      |
| 4th Quartile (highest)                                                                 | 0.828<br>(-1.949, 3.606)      | 0.834<br>(-1.923, 3.591)      | 0.859<br>(-1.904, 3.622)      |
| Unemployment rate (baseline is 1st Quartile [lowest]) <sup>e</sup>                     |                               |                               |                               |
| 2nd Quartile                                                                           | 1.630<br>(-0.748, 4.008)      | 1.633<br>(-0.747, 4.014)      | 1.676<br>(-0.712, 4.064)      |
| 3rd Quartile                                                                           | 3.035**<br>(0.00632, 6.064)   | 3.038*<br>(-0.000915, 6.077)  | 3.058**<br>(0.0111, 6.105)    |
| 4th Quartile (highest)                                                                 | 2.336<br>(-0.592, 5.264)      | 2.306<br>(-0.631, 5.242)      | 2.349<br>(-0.601, 5.298)      |
| Without broadband rate (baseline is 1st Quartile [lowest]) <sup>f</sup>                |                               |                               |                               |
| 2nd Quartile                                                                           | -1.339<br>(-3.138, 0.461)     | -1.347<br>(-3.141, 0.446)     | -1.321<br>(-3.124, 0.482)     |
| 3rd Quartile                                                                           | -2.546***<br>(-4.082, -1.011) | -2.548***<br>(-4.088, -1.008) | -2.535***<br>(-4.078, -0.991) |
| 4th Quartile (highest)                                                                 | -2.521**<br>(-4.623, -0.419)  | -2.495**<br>(-4.604, -0.386)  | -2.468**<br>(-4.589, -0.346)  |
| Percent not English only in household (baseline is 1st Quartile [lowest]) <sup>g</sup> |                               |                               |                               |
| 2nd Quartile                                                                           | 0.271<br>(-1.706, 2.248)      | 0.307<br>(-1.672, 2.287)      | 0.285<br>(-1.698, 2.269)      |
| 3rd Quartile                                                                           | 1.041<br>(-1.426, 3.508)      | 1.064<br>(-1.410, 3.538)      | 1.006<br>(-1.462, 3.473)      |
| 4th Quartile (highest)                                                                 | 3.428<br>(-0.792, 7.648)      | 3.397<br>(-0.825, 7.619)      | 3.386<br>(-0.831, 7.603)      |
| Year fixed effect (baseline is 2019)                                                   | -0.415<br>(-1.001, 0.170)     | -0.466<br>(-1.043, 0.112)     | -0.392<br>(-0.984, 0.199)     |
| Interaction pre-post dummy and young children (0-12 years)                             | -57.91***<br>(-65.49, -50.32) |                               |                               |
| Interaction pre-post dummy and teenagers (13-18 years)                                 | -18.39**                      |                               |                               |

**Appendix**  
**Who Is (and Isn't) Receiving Telemedicine Care During the COVID-19 Pandemic**  
**Cantor et al.**

|                                                                 |                  |                  |                  |
|-----------------------------------------------------------------|------------------|------------------|------------------|
|                                                                 | (-32.44, -4.328) |                  |                  |
| Interaction pre–post dummy and younger adults (19–45 years)     | -22.02***        |                  |                  |
|                                                                 | (-30.19, -13.86) |                  |                  |
| Interaction between pre–post dummy and county is rural          |                  | -40.60***        |                  |
|                                                                 |                  | (-50.34, -30.86) |                  |
| Interaction between pre–post dummy and second poverty quartile  |                  |                  | -16.23***        |
|                                                                 |                  |                  | (-28.04, -4.409) |
| Interaction between pre–post dummy and third poverty quartile   |                  |                  | -24.86***        |
|                                                                 |                  |                  | (-38.56, -11.15) |
| Interaction between pre–post dummy and highest poverty quartile |                  |                  | -31.70***        |
|                                                                 |                  |                  | (-48.23, -15.17) |
| Constant                                                        | -8.853***        | -9.673***        | -7.291**         |
|                                                                 | (-14.38, -3.330) | (-15.52, -3.826) | (-13.11, -1.466) |
| Observations                                                    | 3,075,367        | 3,075,367        | 3,075,367        |

Note: CIs are in parentheses. \*\*\* $p < 0.01$ ; \*\* $p < 0.05$ ; \* $p < 0.1$ .

<sup>a</sup>Pre period is defined as all of 2019 and weeks 1 through 10 in 2020.

<sup>b</sup>U.S. county metropolitan classification according to the county where the patient resides

([https://www.cdc.gov/nchs/data\\_access/urban\\_rural.htm](https://www.cdc.gov/nchs/data_access/urban_rural.htm)).

<sup>c</sup>Share of U.S. county (percent) living below the federal poverty line in the county where the patient resides

(<https://www.census.gov/topics/income-poverty/poverty/data/tables/acs.html>).

<sup>d</sup>Is the number of COVID-19 cases per 10,000 population in the county as of July 31, 2020 from USAFacts.

<sup>e</sup>Is the county-level unemployment rate as reported by the Bureau of Labor Statistics for July.

<sup>f</sup>Is the share of a county that does not have broadband Internet as reported by the Federal Communications Commission using the Mapping Broadband Health in America.

<sup>g</sup>Is the share of a county that does not only speak English only in their household as reported in the 5-year American Community Survey.
